# Supplementary material for: An altered heparan sulfate structure in the articular cartilage protects against osteoarthritis
Source: PubMed Central journal article supplement — Osteoarthritis Cartilage. Author manuscript; Available in PMC 2021 Sep 7. (PMC8422443; doi:10.1016/j.joca.2020.04.002), 2020-04-18
Supplement: NIHMS1736972-supplement-Supplemental_files.pdf [file NIHMS1736972-supplement-Supplemental_files.pdf]

## Supplementary Information: Statistical analysis

In the shorthand formula notation for linear mixed-effects models [1] the models used were:

1.  $OAScore \sim Age * Genotype$  for the beta regression with rstanarm function `stan_betareg`. In this model Age was a continuous variable (unit = 1 month).
2.  $\log OAScore \sim Genotype + (1|Litter)$  with rstanarm function `stan_glmer`. In this case the OA scores were far from the boundaries 0 and 6, and their logarithms approximately normally distributed so that we could use the above generalized linear mixed model with a Gaussian or t-distributed noise.
3.  $\log CartilageThickness \sim Age * Genotype + (1|Litter)$  for use with rstanarm function `stan_glmer`.
4.  $\Delta Ct \sim Primer -1 + RetinoicAcid + Genotype + (1|Animal)$  with  $\Delta Ct$  the qPCR response values, primer the type of protease primer, RetinoicAcid for treatment with retinoic acid (yes or no), Genotype (wt vs mutant), and Animal for ID of animal.
5.  $\log AggrecanDigestionSignal \sim Genotype + SampleType + (1|Litter)$  with SampleType being one of Medium or GuHCL and using the rstanarm function `stan_glmer`.
6.  $\log ZymogramSignal \sim Genotype * RetinoicAcid + (1|Litter)$  with stan model as given below in section Priors.

Inference of parameter value probabilities was carried out by Bayesian analysis using the probabilistic programming language Stan [2], through the R-package rstanarm [3], version 2.18.2, as interface. Priors proposed by rstanarm functions `stan_glmer` and `stan_betareg`, respectively, were used throughout. Priors are listed below.

For each model, Stan generated 4 Markov chains, each of 2000 iterations (1000 for warm-up, 1000 for sampling). Gelman-Rubin  $\hat{R}$  values were found in all cases to be less than 1.05, indicating convergence of Markov chains. For all models, posterior predictive checks showed good agreement of measured responses and responses simulated with the respective model. Results of Bayesian analysis are typically reported as means of marginal posteriors of parameters of interest, for instance a mean change of OARSI score per month of ageing. As a measure of uncertainty of these means, we report them together with their respective 95% HDI, i.e. intervals of 95% highest density of marginal posterior probability; in other words, the inferred means are within the 95% HDI with a probability of 0.95.

## Priors

For the intercepts and slopes (“coefficients”) of the models, the default prior (“specified prior”) is given together with the prior after adjusting for the actual data (“adjusted prior”). The adjusted priors are weakly informative, i.e. they are much broader than the distribution of the actual data, but not too broad, so that exploration of nonsensical parameter regions is avoided. Priors for each of the models:

### 1 OAScore ~ Age \* Genotype

*Experiment: Ageing of Col2-rtTA-Cre;Ext1<sup>e2fl/e2fl</sup> mice, scoring at 3, 6, 12 and 18 months*

Figure: 1B and D

Intercept (after predictors centered)

~ normal(location = 0, scale = 10)

## Coefficients

Specified prior:

~ normal(location = [0,0,0], scale = [2.5,2.5,2.5])

Adjusted prior:

~ normal(location = [0,0,0], scale = [2.50,0.40,0.39])

## Auxiliary (phi)

~ exponential(rate = 1)

## 2 log OAScore ~ Genotype + (1|Litter)

2.1 Experiment: Scoring after surgical induction of OA in Col2-rtTA-Cre;Ext1<sup>e2fl/e2fl</sup>

mice

Figure: 1C

Intercept (after predictors centered)

Specified prior:

~ normal(location = 0, scale = 10)

Adjusted prior:

~ normal(location = 0, scale = 1.7)

## Coefficients

Specified prior:

~ normal(location = 0, scale = 2.5)

Adjusted prior:

~ normal(location = 0, scale = 0.44)

Auxiliary (sigma)

Specified prior:

~ exponential(rate = 1)

Adjusted prior:

~ exponential(rate = 5.7)

Covariance

~ decov(reg. = 1, conc. = 1, shape = 1, scale = 1)

## 2.2 Experiment: Scoring after surgical induction of OA in *Ndst1*<sup>+/-</sup> mice

Figure: 2A and B

Intercept (after predictors centered)

Specified prior:

~ normal(location = 0, scale = 10)

Adjusted prior:

~ normal(location = 0, scale = 1.9)

Coefficients

Specified prior:

~ normal(location = 0, scale = 2.5)

Adjusted prior:

~ normal(location = 0, scale = 0.48)

Auxiliary (sigma)

Specified prior:

~ exponential(rate = 1)

Adjusted prior:

~ exponential(rate = 5.2)

Covariance

~ decov(reg. = 1, conc. = 1, shape = 1, scale = 1)

### 2.3 Experiment: Scoring after surgical induction of OA in Col2-Cre;Ndst1<sup>fl/fl</sup> mice

Figure: 2A and B

Intercept (after predictors centered)

Specified prior:

~ normal(location = 0, scale = 10)

Adjusted prior:

~ normal(location = 0, scale = 1.7)

Coefficients

Specified prior:

~ normal(location = 0, scale = 2.5)

Adjusted prior:

~ normal(location = 0, scale = 0.43)

Auxiliary (sigma)

Specified prior:

~ exponential(rate = 1)

Adjusted prior:

~ exponential(rate = 5.9)

Covariance

~ decov(reg. = 1, conc. = 1, shape = 1, scale = 1)

### 3 log CartilageThickness ~ Age \* Genotype + (1|Litter)

*Experiment: Quantification of articular cartilage thickness in Col2-Cre;Ndst1<sup>fl/fl</sup> mice, analysis at 1, 3 and 18m*

Figure: 2C and D

Intercept (after predictors centered)

Specified prior:

~ normal(location = 0, scale = 10)

Adjusted prior:

~ normal(location = 0, scale = 1.2)

Coefficients

Specified prior:

~ normal(location = [0,0,0,...], scale = [2.5,2.5,2.5,...])

Adjusted prior:

~ normal(location = [0,0,0,...], scale = [0.30,0.30,0.30,...])

Auxiliary (sigma)

Specified prior:

~ exponential(rate = 1)

Adjusted prior:

~ exponential(rate = 8.4)

Covariance

~ decov(reg. = 1, conc. = 1, shape = 1, scale = 1)

#### 4 $\Delta\text{Ct} \sim \text{Primer} -1 + \text{RetinoicAcid} + \text{Genotype} + (1|\text{Animal})$

*Experiment: Gene expression analysis by qRT-PCR*

Figure: 3A and B

Coefficients

Specified prior:

~ normal(location = [0,0,0,...], scale = [2.5,2.5,2.5,...])

Adjusted prior:

~ normal(location = [0,0,0,...], scale = [4.29,4.29,4.29,...])

Auxiliary (sigma)

Specified prior:

~ exponential(rate = 1)

Adjusted prior:

~ exponential(rate = 0.58)

Covariance

~ decov(reg. = 1, conc. = 1, shape = 1, scale = 1)

## 5 log AggreCanDigestionSignal ~ Genotype + SampleType + (1|Litter)

### 5.1 Experiment: Detection of NITEGE neo-epitope by Western Blot

Figure: 4A and B

Intercept (after predictors centered)

Specified prior:

~ normal(location = 0, scale = 10)

Adjusted prior:

~ normal(location = 0, scale = 18)

Coefficients

Specified prior:

~ normal(location = [0,0], scale = [2.5,2.5])

Adjusted prior:

~ normal(location = [0,0], scale = [4.53,4.53])

Auxiliary (sigma)

Specified prior:

~ exponential(rate = 1)

Adjusted prior:

~ exponential(rate = 0.55)



## Covariance

~ decov(reg. = 1, conc. = 1, shape = 1, scale = 1)

## 5.2 Experiment: Detection of VDIPEN neo-epitopes by Western Blot

Figure: 4A and B

## Intercept (after predictors centered)

Specified prior:

~ normal(location = 0, scale = 10)

Adjusted prior:

~ normal(location = 0, scale = 9.3)

## Coefficients

Specified prior:

~ normal(location = [0,0], scale = [2.5,2.5])

Adjusted prior:

~ normal(location = [0,0], scale = [2.33,2.33])

## Auxiliary (sigma)

Specified prior:

~ exponential(rate = 1)

Adjusted prior:

~ exponential(rate = 1.1)

## Covariance

~ decov(reg. = 1, conc. = 1, shape = 1, scale = 1)

## 6 log ZymogramSignal ~ Genotype\*RetinoicAcid + (1|Litter)

*Experiment: Analysis of protease activity by gelatine zymography*

Figure: 4C and D

For technical reasons, this model could not be implemented in rstanarm. To allow for the modeling of outliers, we had to assume a Student-t distributed noise. We therefore developed the stan program given here:

```
// start of stan code
```

```
data {
```

```
  int<lower=1> N; // number of measurements
```

```
  real y[N]; // log zymogram signal
```

```
  int<lower=1> n_litters; // number of litters
```

```
  int<lower=1> litter[N]; // litter of each measurement
```

```
  int<lower=-1, upper=1> RA[N]; // retinonic acid (RA) treatment
```

```
  int<lower=-1, upper=1> gt[N]; // genotype
```

```
}
```

```
parameters {
```

```
  real a_0; // overall intercept
```

```
  real a_litter[n_litters]; // litter specific intercept
```

```
  real beta_RA; // slope for RA treatment
```

```
  real beta_gt; // slope for genotype
```

```
  real beta_RA_gt; // slope for interaction of RA and genotype
```

```
real<lower=0.0> sigma[n_litters]; // standard deviation (sd) of litter signal
real<lower=0.0> sigma_a; // sd of litter level intercepts
real<lower=0.0> sigma_l;
real<lower=0.0> nu;
}
```

```
transformed parameters {
```

```
vector[N] mu; // mean y
```

```
for (i in 1:N){ // linear model with interaction
```

```
mu[i] = a_0 +
```

```
  a_litter[litter[i]] +
```

```
  beta_RA * RA[i] +
```

```
  beta_gt * gt[i] +
```

```
  beta_RA_gt * RA[i] * gt[i];
```

```
}
```

```
}
```

```
model {
```

```
  // priors
```

```
  a_0 ~ normal(0.0, 10.0);
```

```
  beta_RA ~ normal(0.0, 2.0);
```

```
  beta_gt ~ normal(0.0, 2.0);
```

```
  beta_RA_gt ~ normal(0.0, 2.0);
```

```
  sigma_a ~ exponential(1);
```

```

sigma_l ~ exponential(1);
nu ~ exponential(0.1);

// hierarchical level of litters
for (i in 1:n_litters) {
  sigma[i] ~ exponential(sigma_l);
  a_litter[i] ~ normal(0, sigma_a);
}

// Student-t noise
for (i in 1:N) {
  y[i] ~ student_t(nu, mu[i], sigma[litter[i]]);
}
}

generated quantities { // for PPC and leave-one-ont crossvalidation
  real y_rep[N];
  vector[N] log_lik;

  for (i in 1:N){
    y_rep[i] = student_t_rng(nu, mu[i], sigma[litter[i]]);
    log_lik[i] = student_t_lpdf(y[i] | nu, mu[i], sigma[litter[i]]);
  }
}

// end of stan code

```

## References

1. Bates D, Mächler M, Bolker B, Walker S. Fitting linear mixed-effects models using lme4. *Journal of Statistical Software* 2015; 67: 1-48.
2. Carpenter B, Gelman A, Hoffman MD, Lee D, Goodrich B, Betancourt M, et al. Stan: A Probabilistic Programming Language. *Journal of Statistical Software* 2017; 76.
3. Goodrich B, Gabry J, Ali I, Brilleman S. rstanarm: Bayesian applied regression modeling via Stan. R package version 2.17.4. 2018.

*An altered heparan sulfate structure in the articular cartilage protects against osteoarthritis*

*A.-C. Severmann, K. Jochmann, K. Feller, V. Bachvarova, V. Piombo, R. Stange, T. Holzer, B. Brachvogel, J. Esko, T. Pap, D. Hoffmann, A. Vortkamp*

*Osteoarthritis and Cartilage*  
Volume 28 Issue 7 Pages 977-987 (July 2020)  
DOI: 10.1016/j.joca.2020.04.002

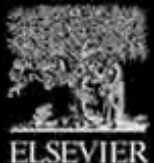

Supplementary Fig. 1

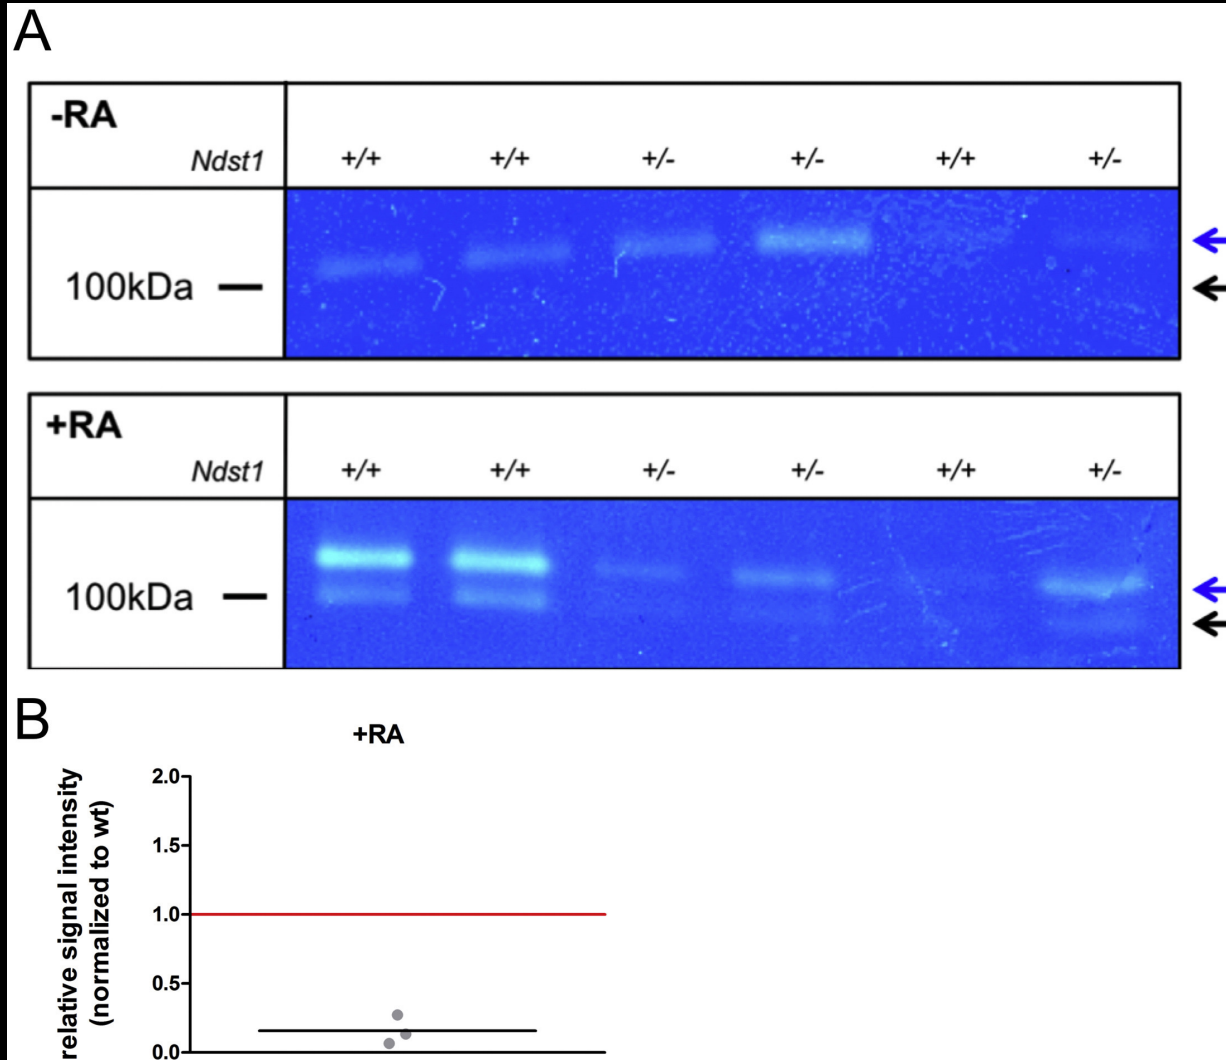

### Supplementary Table 3

|                                                              | Figure       | Parameter           | Effect size                   | 95% HDI        |              |
|--------------------------------------------------------------|--------------|---------------------|-------------------------------|----------------|--------------|
|                                                              |              |                     |                               |                |              |
| Ageing<br><i>Col2-Cre;Ext1<sup>e2fl/e2fl</sup></i>           | 1B           | Genotype            | Mean OA-score<br>0.49 (M/WT)  | -0.27          | 1.25         |
|                                                              |              | Age                 | Mean OA-score<br>0.13 (M/WT)  | 0.08           | 0.18         |
|                                                              |              | Genotype<br>and Age | Mean OA-score<br>-0.09 (M/WT) | -0.16          | -0.03        |
| ACLT surgery<br><i>Col2-Cre;Ext1<sup>e2fl/e2fl</sup></i>     | 1C           | Genotype            | Median factor<br>0.83 (M/WT)  | 0.72           | 0.96         |
| ACLT surgery<br><i>Ndst1</i>                                 | 2B           | Genotype            | Median factor<br>0.82 (M/WT)  | 0.74           | 0.90         |
| ACLT surgery<br><i>Col2-Cre;Ndst1<sup>fl/fl</sup></i>        | 2B           | Genotype            | Median factor<br>0.87 (M/WT)  | 0.76           | 1.00         |
| Cartilage thickness<br><i>Col2-Cre;Ndst1<sup>fl/fl</sup></i> | 2D           | Genotype            | Mean factor<br>1.24 (M/WT)    | 1.15           | 1.33         |
| Expression<br><i>Ndst1</i>                                   | 3A           | Genotype            | Mean effect                   |                |              |
|                                                              |              | Adamts4             | 0.39                          | -1.09          | 2.18         |
|                                                              |              | Adamts5             | 0.05                          | -1.14          | 1.28         |
|                                                              |              | Mmp2                | -0.01                         | -1.24          | 1.24         |
|                                                              |              | Mmp3                | 0.02                          | -1.23          | 1.36         |
|                                                              |              | Mmp9                | 0.21                          | -0.97          | 1.61         |
|                                                              |              | Mmp13               | -0.11                         | -1.54          | 1.23         |
| Expression<br><i>Ndst1</i>                                   | 3B           | Genotype            | Mean effect                   |                |              |
|                                                              |              | Timp1               | 0.04                          | -0.78          | 1.04         |
|                                                              |              | Timp2<br>Timp3      | 0.11<br>0.11                  | -0.75<br>-0.62 | 1.12<br>1.28 |
| Aggrecan<br>degradation<br><br>+RA                           | 4A<br>NITEGE | Genotype            | Mean increase<br>4.24 (WT/M)  | 1.05           | 18.55        |
|                                                              |              | Sample type         | Mean increase<br>2.14 (WT/M)  | 0.52           | 8.75         |
|                                                              | VDIPEN       | Genotype            | Mean increase<br>1.54 (WT/M)  | 1.00           | 2.34         |
|                                                              |              | Sample type         | Mean increase<br>1.63 (WT/M)  | 1.09           | 2.45         |
| Zymography<br>-RA                                            | 4B           | Genotype            | Median factor<br>1.09 (M/WT)  | 0.90           | 1.34         |
|                                                              |              | Genotype            | Median factor<br>0.77 (M/WT)  | 0.60           | 0.96         |
| Zymography<br>+RA                                            | Sup. 2       | Genotype            | Mean factor<br>0.69 (M/WT)    | 0.44           | 1.14         |



## Supplementary Table 4

| Figure |                                                                                                                  |                                                                          |                                                                                                                   |
|--------|------------------------------------------------------------------------------------------------------------------|--------------------------------------------------------------------------|-------------------------------------------------------------------------------------------------------------------|
|        | <i>Ext1<sup>e2fl/e2fl</sup></i>                                                                                  | <i>Col2-rtTA-Cre;Ext1<sup>e2fl/e2fl</sup></i>                            |                                                                                                                   |
| 1B/D   | 3M: 11<br>6M: 6<br>12M: 4<br>18M: 6                                                                              | 3M: 11<br>6M: 6<br>12M: 2<br>18M: 8                                      | Individuals                                                                                                       |
|        | <i>Ext1<sup>e2fl/e2fl</sup></i>                                                                                  | <i>Col2-rtTA-Cre;Ext1<sup>e2fl/e2fl</sup></i>                            |                                                                                                                   |
| 1C     | Sham: 8<br>ACLT: 11                                                                                              | Sham: 7<br>ACLT: 13                                                      | Individuals, from 4 litters                                                                                       |
|        | <i>Ndst1<sup>+/+</sup></i>                                                                                       | <i>Ndst1<sup>+/-</sup></i>                                               |                                                                                                                   |
| 2B     | Sham: 6<br>ACLT: 12                                                                                              | Sham: 5<br>ACLT: 9                                                       | Individuals, from 3 litters                                                                                       |
|        | <i>Ndst1<sup>fl/fl</sup></i>                                                                                     | <i>Col2-Cre;Ndst1<sup>fl/fl</sup></i>                                    |                                                                                                                   |
|        | Sham: 6<br>ACLT: 12                                                                                              | Sham: 6<br>ACLT: 9                                                       | Individuals, from 3 litters                                                                                       |
|        | <i>Ndst1<sup>fl/fl</sup></i>                                                                                     | <i>Col2-Cre;Ndst1<sup>fl/fl</sup></i>                                    |                                                                                                                   |
| 2D     | 1m: 6<br>3m: 6<br>18m: 7                                                                                         | 1m: 5<br>3m: 7<br>18m: 6                                                 | Individuals, from<br>1m: 2 litters<br>3m: 3 litters<br>18m: 4 litters                                             |
|        | <i>Ndst1<sup>+/+</sup></i>                                                                                       | <i>Ndst1<sup>+/-</sup></i>                                               |                                                                                                                   |
| 3A, B  | Litter 1: 1 pool (2 mice)<br>Litter 2: 1 pool (4 mice)<br>Litter 3: 1 pool (3 mice)<br>Litter 4: 1 pool (3 mice) | 1 pool (2 mice)<br>1 pool (3 mice)<br>1 pool (3 mice)<br>1 pool (4 mice) | Used samples:<br>Adams4, 5: litter 1-4<br>Mmp2: litter 1-3<br>Mmp3, 9, 13: litter 1-4<br>Timp 1, 2, 3: litter 1-3 |
|        | <i>Ndst1<sup>+/+</sup></i>                                                                                       | <i>Ndst1<sup>+/-</sup></i>                                               |                                                                                                                   |
| 4B     | Litter 1: 1 pool (7 mice)<br>Litter 2: 2 pools (4 mice each)<br>Litter 3: 2 pools (3 mice each)                  | 1 pool (3 mice)<br>1 pool (2 mice)<br>1 pool (2 mice)                    | Used samples<br>NITEGE: litter 1-3<br>VDIPEN: litter 1-3                                                          |
|        | <i>Ndst1<sup>+/+</sup></i>                                                                                       | <i>Ndst1<sup>+/-</sup></i>                                               |                                                                                                                   |
| 4D     | 17                                                                                                               | 17                                                                       | Individuals<br>(from 6 litters)                                                                                   |
|        | <i>Ndst1<sup>+/+</sup></i>                                                                                       | <i>Ndst1<sup>+/-</sup></i>                                               |                                                                                                                   |
| S2     | 3                                                                                                                | 3                                                                        | Individuals<br>(from 1 litter)                                                                                    |

Supplementary Table 2

|                | Primer 1             | Primer 2             |
|----------------|----------------------|----------------------|
| <i>Adamts4</i> | gagtcccatttcccgcagaa | ataaccgtcagcaggtagcg |
| <i>Adamts5</i> | gggcacaggctactatgtgg | gccgtcacatccagttctca |
| <i>Mmp2</i>    | cgcgtaaagtatgggaacgc | ggtaaacaaggctcatgggg |
| <i>Mmp3</i>    | gtctccctgcaaccgtgaag | acccttgagtcaacacctgg |
| <i>Mmp9</i>    | ccagccgacttttgggtct  | tggccttagtgtctggctg  |
| <i>Mmp13</i>   | gccattaccagtctccgagg | ggcacgggatggatgttca  |
| <i>Timp1</i>   | cttctggttccctggcgta  | ggacctgatccgtccacaaa |
| <i>Timp2</i>   | gctggacgtggaggaaaga  | gacagcgagtgatcttgac  |
| <i>Timp3</i>   | ccgacatcgtgatccggg   | cacgtggggcatcttactga |

## Supplementary Table 1

|                                              | Primer 1                 | Primer 2                  | Primer 3                  | Annealing Temperature [°C] |
|----------------------------------------------|--------------------------|---------------------------|---------------------------|----------------------------|
| <i>Ext1<sup>e2fl/e2fl</sup></i>              | gagtcctcctgctctg<br>cat  | ttgtgcatgggaaaga<br>caa   |                           | 62                         |
| <i>Col2-rtTA-Cre</i>                         | gagtgatgaggttcgc<br>aaga | ctacaccagagacgg           |                           | 55                         |
| <i>R26R-LacZ</i>                             | aagaccggaagagt<br>ttgc   | aaagtcgctctgagttg<br>ttat | ggagcgggagaaatg<br>gatatg | 58                         |
| <i>Ndst1</i><br><i>Ndst1<sup>fl/fl</sup></i> | catcctctgaggtgacc<br>gc  | ccagggcgtcagggc<br>ctcctg | cccagatggcgagac<br>tgagg  | 60                         |
| <i>Col2-Cre</i>                              | gagtgatgaggttcgc<br>aaga | ctacaccagagacgg           |                           | 55                         |
